# Supplementary material for: Comprehensive Analysis of Oncological Outcomes of Radical Cystectomy for Non-muscle Invasive Bladder Cancer
Source: Research Square preprint supplement (doi:10.21203/rs.3.rs-7062273/v1), 2025-08-12
Supplement: Supplementary file 1 [file 04ab84eec97a95d4eb0e7946.xlsx]

## Sheet: Table 1
Table 1. Baseline and perioperative characteristics of patients with cTa, cTis, and cT1 bladder cancer.
	Total		cTa		cTis		cT1
	(n = 435)		(n = 54)		(n = 84)		(n = 297)
Age at RC, medial (IQR), y	70	(65;75)	71	(65;75)	72	(66;76)	70	(65;75)
Sex, n (%)
Male	368	(84.6)	49	(90.7)	64	(76.2)	255	(85.9)
Female	67	(15.4)	5	(9.3)	20	(23.8)	42	(14.1)
BMI, median (IQR)	23.0	(21.0;25.0)	22.6	(20.8;25.8)	23.0	(20.9;24.9)	23.0	(21.0;24.9)
ECOG PS, n (%)
0 or 1	391	(89.9)	48	(88.9)	74	(88.1)	269	(90.6)
2 or higher	13	(3.0)	0	(0.0)	3	(3.6)	10	(3.4)
Missing	31	(7.1)	6	(1.1)	7	(8.3)	18	(6.1)
Smoking status, n (%)
None	109	(25.1)	14	(25.9)	27	(32.1)	68	(22.9)
Past/current	252	(57.9)	29	(53.7)	41	(48.8)	182	(61.3)
Missing	74	(17.0)	11	(20.4)	16	(19.0)	47	(15.8)
History of NMIBC, n (%)
No	240	(55.2)	21	(38.9)	31	(36.9)	188	(63.3)
Yes	183	(42.1)	31	(57.4)	50	(59.5)	102	(34.3)
Missing	12	(2.8)	2	(3.7)	3	(3.6)	7	(2.4)
History of BCG, n (%)
No	245	(56.3)	23	(51.9)	20	(32.1)	202	(68.0)
Yes	161	(37.0)	25	(37.0)	59	(61.9)	77	(25.9)
Missing	29	(6.7)	6	(11.1)	5	(6.0)	18	(6.1)
Tumour multiplicity, n (%)
Single	87	(24.8)	12	(22.2)	NA		75	(25.3)
Multiple	223	(63.5)	31	(57.4)	NA		192	(64.6)
Missing	41	(11.7)	11	(20.4)	NA		30	(10.1)
Size of tumours, n (%)
Less than 3 cm	194	(55.3)	26	(48.1)	NA		168	(56.6)
3 cm or larger	94	(26.7)	11	(20.4)	NA		83	(27.9)
Missing	63	(18.0)	17	(31.5)	NA		46	(15.5)
Tumour grade at TUR, n (%)
Low grade	16	(3.7)	9	(16.7)	1	(1.2)	6	(2.0)
High grade	362	(83.2)	37	(68.5)	59	(70.2)	266	(89.6)
Missing	57	(13.1)	8	(14.8)	24	(28.6)	25	(8.4)
Histology type at TUR, n (%)
Pure UC	384	(88.3)	53	(98.1)	79	(94.0)	252	(84.8)
Histological subtype	48	(11.1)	1	(1.9)	4	(4.8)	43	(14.5)
Missing	3	(0.7)	0	(0.0)	1	(1.2)	2	(0.7)
Concurrent CIS at TUR, n (%)
No	226	(64.4)	38	(70.4)	NA		188	(63.3)
Yes	115	(32.8)	14	(25.9)	NA		101	(34.0)
Missing	10	(2.8)	2	(3.7)	NA		8	(2.7)
NAC >=2 cycles, n (%)
No	373	(85.7)	49	90.7	78	92.9	246	82.8
Yes	62	(14.3)	5	9.3	6	7.1	51	17.2
Surgical procedure, n (%)
Open	242	(55.6)	38	(70.4)	43	(51.2)	161	(54.2)
Laparoscopic	132	(30.3)	11	(20.4)	24	(28.6)	97	(32.7)
Robotic	61	(14.0)	5	(9.3)	17	(20.2)	39	(13.1)
Extent of LND, n (%)
None	39	(9.0)	6	(11.1)	14	(16.7)	19	(6.4)
Limited	33	(7.6)	1	(1.9)	8	(9.5)	24	(8.1)
Standard	202	(46.4)	21	(38.9)	37	(44.0)	144	(48.5)
Extended	154	(35.4)	24	(44.4)	25	(29.8)	105	(35.4)
Missing	7	(1.6)	2	(3.7)	0	(0.0)	5	(1.7)
Pathological T stage, n (%)
T0	80	(18.4)	5	(9.3)	15	(17.9)	60	(20.2)
Ta/Tis/T1	252	(57.9)	34	(63.0)	61	(72.6)	157	(52.9)
T2	55	(12.6)	9	(16.7)	6	(7.1)	40	(13.5)
T3 or greater	46	(10.6)	6	(11.1)	2	(2.4)	38	(12.8)
Missing	2	(0.5)	0	(0.0)	0	(0.0)	2	(0.7)
Pathological N status, n (%)
N0	369	(84.8)	45	(83.3)	69	(82.1)	255	(85.9)
N+	28	(6.4)	4	(7.4)	1	(1.2)	23	(7.7)
NX	38	(8.7)	5	(9.3)	14	(16.7)	19	(6.4)
Adjuvant chemotherapy, n (%)
No	403	(92.6)	48	88.9	83	98.8	272	91.6
Yes	32	(7.4)	6	11.1	1	1.2	25	8.4
