# Supplementary material for: Comprehensive Analysis of Oncological Outcomes of Radical Cystectomy for Non-muscle Invasive Bladder Cancer
Source: Research Square preprint supplement (doi:10.21203/rs.3.rs-7062273/v1), 2025-08-12
Supplement: Supplementary file 2 [file 06a8ba53d49b23bf780ea84f.xlsx]

## Sheet: Table 3
Table 3. Logistic regression analysis of preoperative risk factors associated with pathological upstaging in patients with cTa and cT1 bladder cancer based on complete case dataset.
	Univariate analysis			Multivariate analysis
Variable	OR (95% CI)	P value		OR (95% CI)	P value
Age (per 10 year increase)	1.24 (0.94–1.64)	0.13
Sex, male vs. female	0.79 (0.41–1.53)	0.482
ECOG-PS, >=2 vs. 0–1	2.52 (0.71–8.92)	0.15
Smoking history	0.70 (0.40–1.22)	0.21
History of NMIBC	1.07 (0.66–1.73)	0.79
History of BCG	0.79 (0.47–1.34)	0.38
Tumour multiplicity, multiple vs. solitary	1.15 (0.67–2.00)	0.62
Size of tumours, >=3 cm vs. <3cm	1.86 (1.09–3.16)	0.02		1.90 (1.06–3.40)	0.03
Clinical T stage, cT1 vs. cTa	0.94 (0.69–1.30)	0.722		0.86 (0.59–1.25)	0.43
Concomitant CIS (TUR)	0.69 (0.41–1.17)	0.17		0.74 (0.41–1.36)	0.34
Histological subtype (TUR)	0.38 (0.15–0.92)	0.03		0.40 (0.16–1.01)	0.05
NAC, >=2 cylcles vs. 0–1 cycle	0.95 (0.50–1.81)	0.88		0.65 (0.31–1.37)	0.26
