# Supplementary material for: Comprehensive Analysis of Oncological Outcomes of Radical Cystectomy for Non-muscle Invasive Bladder Cancer
Source: Research Square preprint supplement (doi:10.21203/rs.3.rs-7062273/v1), 2025-08-12
Supplement: Supplementary file 3 [file 1fe04c9acc2b2c25a3a12684.xlsx]

## Sheet: Table 2
Table 2. Cox proportional hazards analysis of risk factors associated with cancer-specific mortality in patients with cTa and cT1 bladder cancer based on the complete case dataset.
	Univariate analysis			Multivariate analysis
Variable	HR (95% CI)	P value		HR (95% CI)	P value
Age (per 10 year increase)	1.61 (1.04–2.48)	0.03		1.69 (1.05–2.73)	0.032
Sex, male vs. female	1.06 (0.41–2.72)	0.91
ECOG-PS, >=2 vs. 0–1	3.88 (1.18–12.73)	0.025		2.32 (0.66–8.23)	0.19
Smoking history	0.79 (0.37–1.66)	0.53
History of NMIBC	1.32 (0.68–2.54)	0.41
History of BCG	0.58 (0.25–1.33)	0.2
Tumour multiplicity, multiple vs. solitary	2.06 (0.80–5.34)	0.14
Size of tumours, >=3 cm vs. <3cm	1.52 (0.75–3.07)	0.25
Clinical T stage, cT1 vs. cTa	3.28 (0.79–13.62)	0.1		4.07 (0.96–17.24)	0.0566
Concomitant CIS (TUR and/or RC)	0.74 (0.39–1.42)	0.36
NAC, >=2 cylcles vs. 0–1 cycle	1.18 (0.49–2.84)	0.71		2.06 (0.81–5.25)	0.13
Surgical technique
laparoscopic vs. open	0.42 (0.18–1.02)	0.054		0.36 (0.15–0.90)	0.0282
robotic vs. open	0.22 (0.03–1.59)	0.13		0.22 (0.03–1.69)	0.15
LND, standard/extended vs. none/limited	0.66 (0.29–1.50)	0.32
Upstaging to >=pT2 or pN+ disease	9.00 (4.35–18.63)	< 0.01		6.77 (3.09–14.86)	< 0.01
Histological subtype (TUR and/or RC)	1.01 (0.44–2.54)	0.9
Adjuvant chemotherapy	4.25 (2.06–8.79)	< 0.01		1.92 (0.83–4.44)	0.13
