# Supplementary material for: Comprehensive Analysis of Oncological Outcomes of Radical Cystectomy for Non-muscle Invasive Bladder Cancer
Source: Research Square preprint supplement (doi:10.21203/rs.3.rs-7062273/v1), 2025-08-12
Supplement: Supplementary file 4 [file 674b7f0e613d7745f6dfb170.xlsx]

## Sheet: Table S1
Table S1. Cox proportional hazards analysis of risk factors associated with cancer-specific mortality in patients with cTa and cT1 bladder cancer based on the multiply imputed datasets.
	Univariate analysis			Multivariate analysis
Variable	HR (95% CI)	P value		HR (95% CI)	P value
Age (per 10 year increase)	No missing values			1.69 (1.03–2.77)	0.04
Sex, male vs. female	No missing values
ECOG-PS, >=2 vs. 0–1	3.93 (1.13–13.66)	0.029		2.34 (0.62–8.80)	0.2
Smoking history	0.82 (0.38–1.78)	0.61
History of NMIBC	1.28 (0.65–2.54)	0.46
History of BCG	0.55 (0.23–1.30)	0.17
Tumour multiplicity, multiple vs. solitary	2.03 (0.75–5.49)	0.16
Size of tumours, >=3 cm vs. <3cm	1.43 (0.67–3.02)	0.33
Clinical T stage, cT1 vs. cTa	No missing values			4.26 (0.94–19.25)	0.058
Concomitant CIS (TUR and/or RC)	No missing values
NAC, >=2 cylcles vs. 0–1 cycle	No missing values			2.06 (0.77–5.50)	0.14
Surgical technique
laparoscopic vs. open	No missing values			0.37 (0.14–0.95)	0.0397
robotic vs. open	No missing values			0.19 (0.02–1.62)	0.124
LND, standard/extended vs. none/limited	0.68 (0.29–1.62)	0.37
Upstaging to >=pT2 or pN+ disease	No missing values			7.26 (3.19–16.50)	< 0.01
Histological subtype (TUR and/or RC)	1.06 (0.43–2.62)	0.9
Adjuvant chemotherapy	No missing values			1.95 (0.81–4.70)	0.13
