# Supplementary material for: Comprehensive Analysis of Oncological Outcomes of Radical Cystectomy for Non-muscle Invasive Bladder Cancer
Source: Research Square preprint supplement (doi:10.21203/rs.3.rs-7062273/v1), 2025-08-12
Supplement: Supplementary file 5 [file 7005759abab825bb57a1357e.xlsx]

## Sheet: Table S2
Table S2. Logistic regression analysis of preoperative risk factors associated with pathological upstaging in patients with cTa and cT1 bladder cancer based on the multiply imputed datasets.
	Univariate analysis			Multivariate analysis
Variable	OR (95% CI)	P value		OR (95% CI)	P value
Age (per 10 year increase)	No missing values
Sex, male vs. female	No missing values
ECOG-PS, >=2 vs. 0–1	2.51 (0.71–8.93)	0.154
Smoking history	0.75 (0.43–1.30)	0.304
History of NMIBC	1.06 (0.65–1.71)	0.822
History of BCG	0.79 (0.47–1.35)	0.389
Tumour multiplicity, multiple vs. solitary	1.16 (0.67–2.02)	0.591
Size of tumours, >=3 cm vs. <3cm	1.85 (1.09–3.14)	0.023		1.93 (1.09–3.40)	0.024
Clinical T stage, cT1 vs. cTa	No missing values			1.00 (0.52–1.92)	0.991
Concomitant CIS (TUR)	0.71 (0.42–1.19)	0.19		0.83 (0.48–1.44)	0.512
Histological subtype (TUR)	0.38 (0.16–0.94)	0.0366		0.36 (0.14–0.90)	0.029
NAC, >=2 cylcles vs. 0–1 cycle	No missing values			0.80 (0.41–1.59)	0.528
